# Supplementary material
Source: Research Square preprint supplement (doi:10.21203/rs.3.rs-9272120/v1)
Supplement: Supplementary file 1 [file 7d975d0c1a1b079f9ef8bcb7.docx]

**Supplementary Information**

Specific technical details and validation procedures related to the AI-enable CXR methodology applied in this study can be found at <https://pubmed.ncbi.nlm.nih.gov/41174036/>.
